# Supplementary material
Source: PubMed Central journal article supplement (PMC8442500)
Supplement: mmc1.pdf [file mmc1.pdf]

# Online Appendix for “Measuring Labor Supply and Demand Shocks during COVID-19”

Pedro Brinca\*

Joao B. Duarte†

Miguel Faria-e-Castro‡

July 2021

## Contents

|                             |          |
|-----------------------------|----------|
| <b>A Additional Tables</b>  | <b>1</b> |
| <b>B Additional Figures</b> | <b>9</b> |

## A Additional Tables

**Table A.1:** Descriptive statistics of hours and real wage growth rates by BLS 2-digit sector

|                               |       | March | April  | Mean  | SD   | Min    | Max  |
|-------------------------------|-------|-------|--------|-------|------|--------|------|
| Construction                  | hours | −0.94 | −17.10 | −0.08 | 1.78 | −17.10 | 2.84 |
|                               | wages | 0.50  | 0.90   | 0.07  | 0.42 | −1.24  | 2.39 |
| Education and Health Services | hours | −1.02 | −12.19 | 0.11  | 0.99 | −12.19 | 0.91 |
|                               | wages | 0.65  | 2.01   | 0.06  | 0.39 | −0.91  | 2.48 |
| Financial Activities          | hours | −0.03 | −3.01  | 0.03  | 0.44 | −3.01  | 1.06 |
|                               | wages | 0.28  | 2.49   | 0.12  | 0.44 | −1.49  | 2.49 |
| Information                   | hours | 0.14  | −8.93  | −0.09 | 0.90 | −8.93  | 2.17 |
|                               | wages | 1.02  | 1.95   | 0.15  | 0.57 | −1.33  | 1.95 |
| Leisure and Hospitality       | hours | −9.41 | −63.03 | −0.29 | 4.94 | −63.03 | 1.92 |
|                               | wages | 0.61  | 7.22   | 0.12  | 0.66 | −1.17  | 7.22 |
| Manufacturing                 | hours | −1.00 | −16.29 | −0.15 | 1.38 | −16.29 | 1.06 |
|                               | wages | 0.73  | 3.58   | 0.05  | 0.51 | −0.99  | 3.58 |

\*Nova School of Business and Economics. Email: [pedro.brinca@novasbe.pt](mailto:pedro.brinca@novasbe.pt).

†Nova School of Business and Economics. Email: [joao.duarte@novasbe.pt](mailto:joao.duarte@novasbe.pt).

‡Federal Reserve Bank of St. Louis. Email: [miguel.fariaecastro@stls.frb.org](mailto:miguel.fariaecastro@stls.frb.org).

**Table A.1:** Descriptive statistics of hours and real wage growth rates by BLS 2-digit sector

|                                    |       | March | April  | Mean  | SD   | Min    | Max  |
|------------------------------------|-------|-------|--------|-------|------|--------|------|
| Mining and Logging                 | hours | -1.87 | -12.09 | -0.01 | 1.82 | -12.09 | 3.96 |
|                                    | wages | 0.45  | 1.55   | 0.11  | 1.07 | -5.73  | 5.56 |
| Other Services                     | hours | -2.53 | -21.65 | -0.09 | 1.72 | -21.65 | 1.32 |
|                                    | wages | 0.71  | 7.26   | 0.12  | 0.66 | -0.87  | 7.26 |
| Professional and Business Services | hours | -0.37 | -11.46 | 0.07  | 1.01 | -11.46 | 1.55 |
|                                    | wages | 0.60  | 4.32   | 0.10  | 0.52 | -0.82  | 4.32 |
| Retail Trade                       | hours | -0.61 | -14.48 | -0.09 | 1.26 | -14.48 | 1.38 |
|                                    | wages | 1.02  | 5.08   | 0.05  | 0.61 | -1.28  | 5.08 |
| Total Private                      | hours | -1.54 | -16.17 | -0.03 | 1.30 | -16.17 | 0.79 |
|                                    | wages | 0.90  | 5.43   | 0.09  | 0.54 | -0.80  | 5.43 |
| Transportation and Warehousing     | hours | -0.65 | -12.73 | 0.07  | 1.13 | -12.73 | 1.34 |
|                                    | wages | 0.51  | 3.91   | 0.04  | 0.49 | -1.58  | 3.91 |
| Utilities                          | hours | -0.65 | 0.10   | 0.02  | 1.01 | -3.95  | 4.95 |
|                                    | wages | 0.61  | 2.39   | 0.09  | 0.89 | -2.90  | 2.86 |
| Wholesale Trade                    | hours | -0.05 | -9.45  | -0.03 | 0.83 | -9.45  | 0.86 |
|                                    | wages | 0.41  | 2.56   | 0.06  | 0.55 | -1.30  | 2.81 |

**Table A.2:** Quantiles for the posterior distributions of labor demand and supply elasticities

| Sector                             | $\beta^l$ (demand) |          |          | $a^l$ (supply) |         |        |
|------------------------------------|--------------------|----------|----------|----------------|---------|--------|
|                                    | p5                 | p50      | p95      | p5             | p50     | p95    |
| Mining and Logging                 | -3.4985            | -1.4533  | -0.57036 | 0.51094        | 1.3784  | 3.331  |
| Utilities                          | -2.7957            | -1.0508  | -0.2748  | 0.72259        | 1.3686  | 2.6255 |
| Construction                       | -14.443            | -4.4111  | -0.70444 | 0.45431        | 2.3951  | 16.097 |
| Manufacturing                      | -3.813             | -1.4151  | -0.45704 | 0.8067         | 1.8056  | 3.8972 |
| Wholesale Trade                    | -1.9119            | -0.74404 | -0.21297 | 0.25625        | 0.73813 | 1.7147 |
| Retail Trade                       | -4.6419            | -2.4711  | -1.2466  | 0.32368        | 1.2577  | 3.7929 |
| Transportation and Warehousing     | -2.2208            | -1.2205  | -0.67791 | 0.2437         | 0.95951 | 2.4964 |
| Information                        | -2.0643            | -0.90012 | -0.34388 | 0.32847        | 0.92223 | 2.1588 |
| Financial Activities               | -2.1287            | -1.0533  | -0.49371 | 0.26154        | 0.93418 | 2.3441 |
| Professional and Business Services | -2.9516            | -1.4611  | -0.72686 | 0.34512        | 1.1377  | 2.9259 |
| Education and Health Services      | -2.2529            | -1.0778  | -0.47521 | 0.3506         | 1.0614  | 2.5915 |
| Leisure and Hospitality            | -4.4276            | -1.9899  | -0.84574 | 0.45443        | 1.4753  | 4.1884 |
| Other Services                     | -2.9106            | -1.4046  | -0.63227 | 0.42351        | 1.193   | 2.8501 |
| Total Private                      | -2.6593            | -1.1375  | -0.40432 | 0.53653        | 1.2244  | 2.6541 |

**Table A.3:** Median and 95% credible interval of the effects of demand and supply shocks on the growth rate of hours, March 2020

| Sector                             | Demand |       |       | Supply |        |       | Difference 68%<br>Credible Interval |
|------------------------------------|--------|-------|-------|--------|--------|-------|-------------------------------------|
|                                    | 50p    | 2.5p  | 97.5p | 50p    | 2.5p   | 97.5p |                                     |
| Total Private                      | -0.57  | -1.33 | -0.03 | -1.43  | -1.99  | -0.67 | [-1.557, -0.068]                    |
| Mining and Logging                 | -0.59  | -1.53 | 0.00  | -1.41  | -2.28  | -0.50 | [-1.605, 0.079]                     |
| Construction                       | -0.00  | -0.70 | 0.27  | -1.36  | -1.79  | -0.68 | [-1.702, -0.816]                    |
| Manufacturing                      | -0.12  | -0.69 | 0.20  | -0.93  | -1.38  | -0.35 | [-1.223, -0.258]                    |
| Wholesale Trade                    | 0.03   | -0.17 | 0.14  | -0.24  | -0.42  | -0.05 | [-0.410, -0.095]                    |
| Retail Trade                       | 0.02   | -0.37 | 0.28  | -0.88  | -1.16  | -0.50 | [-1.194, -0.525]                    |
| Transportation and Warehousing     | -0.39  | -0.89 | -0.01 | -0.70  | -1.12  | -0.22 | [-0.753, 0.185]                     |
| Utilities                          | -0.34  | -0.87 | 0.05  | -0.65  | -1.04  | -0.12 | [-0.762, 0.230]                     |
| Information                        | 0.18   | -0.00 | 0.32  | -0.36  | -0.51  | -0.18 | [-0.673, -0.377]                    |
| Financial Activities               | -0.10  | -0.23 | 0.03  | -0.16  | -0.29  | -0.04 | [-0.185, 0.059]                     |
| Professional and Business Services | -0.17  | -0.52 | 0.01  | -0.66  | -0.92  | -0.31 | [-0.744, -0.162]                    |
| Education and Health Services      | -0.60  | -1.30 | -0.03 | -0.92  | -1.50  | -0.23 | [-1.107, 0.535]                     |
| Leisure and Hospitality            | -4.76  | -8.94 | -0.93 | -6.70  | -10.54 | -2.53 | [-6.275, 2.823]                     |
| Other Services                     | -1.18  | -2.33 | -0.19 | -2.00  | -3.00  | -0.85 | [-1.984, 0.431]                     |

**Table A.4:** Median and 95% credible interval of the effects of demand and supply shocks on the growth rate of hours, April 2020

| Sector                      | Demand |        |       | Supply |        |        | Difference 68%<br>Credible Interval |
|-----------------------------|--------|--------|-------|--------|--------|--------|-------------------------------------|
|                             | 50p    | 2.5p   | 97.5p | 50p    | 2.5p   | 97.5p  |                                     |
| Total Private               | -5.06  | -11.28 | -0.31 | -11.18 | -15.94 | -4.97  | [-12.204, 0.5492]                   |
| Mining and Logging          | -4.78  | -9.50  | -0.84 | -7.34  | -11.32 | -2.62  | [-8.076, 2.293]                     |
| Construction                | -3.65  | -12.78 | -0.32 | -13.47 | -16.82 | -4.33  | [-14.443, -0.375]                   |
| Manufacturing               | -6.36  | -12.93 | -1.14 | -9.89  | -15.13 | -3.32  | [-10.365, 3.447]                    |
| Wholesale Trade             | -3.82  | -8.23  | -0.37 | -5.66  | -9.10  | -1.25  | [-6.556, 3.101]                     |
| Retail Trade                | -3.65  | -9.25  | -0.04 | -10.82 | -14.43 | -5.23  | [-12.276, -0.285]                   |
| Transport. & Warehousing    | -3.61  | -9.06  | -0.01 | -9.26  | -12.85 | -3.81  | [-9.090, 0.655]                     |
| Utilities                   | 1.17   | 0.41   | 1.49  | -1.08  | -1.40  | -0.32  | [-2.467, -1.416]                    |
| Information                 | -3.51  | -6.95  | -0.63 | -5.39  | -8.26  | -1.95  | [-5.545, 1.967]                     |
| Financial Activities        | -0.34  | -2.00  | 0.52  | -2.72  | -3.59  | -1.05  | [-3.241, -0.610]                    |
| Prof. and Business Services | -3.29  | -8.05  | -0.15 | -8.31  | -11.44 | -3.53  | [-9.086, -0.780]                    |
| Education and Health        | -5.47  | -10.77 | -0.63 | -6.92  | -11.76 | -1.62  | [-8.005, 5.076]                     |
| Leisure and Hospitality     | -23.26 | -46.70 | -3.63 | -39.92 | -59.55 | -16.47 | [-38.955, 9.722]                    |
| Other Services              | -6.32  | -14.23 | -0.48 | -15.39 | -21.24 | -7.47  | [-16.701, -0.876]                   |

**Table A.5:** Median and 95% credible interval of the effects of demand and supply shocks on the growth rate of hours, May 2020

| Sector                        | Demand |       |       | Supply |       |       | Difference 68%<br>Credible Interval |
|-------------------------------|--------|-------|-------|--------|-------|-------|-------------------------------------|
|                               | 50p    | 2.5p  | 97.5p | 50p    | 2.5p  | 97.5p |                                     |
| Total Private                 | 1.68   | -0.38 | 4.37  | 2.50   | -0.19 | 4.57  | [-1.999, 3.353]                     |
| Mining and Logging            | 0.57   | -1.28 | 2.00  | -3.71  | -5.24 | -1.86 | [-5.764, -2.548]                    |
| Construction                  | 2.71   | 0.04  | 8.33  | 6.68   | 1.07  | 9.38  | [-2.033, 7.448]                     |
| Manufacturing                 | 2.40   | -0.61 | 5.67  | 1.65   | -1.63 | 4.67  | [-4.330, 2.678]                     |
| Wholesale Trade               | 0.72   | -0.45 | 2.07  | 0.44   | -0.91 | 1.62  | [-1.741, 1.077]                     |
| Retail Trade                  | 1.56   | -0.38 | 4.40  | 3.76   | 0.93  | 5.70  | [-0.715, 4.615]                     |
| Transport. & Warehousing      | 0.12   | -1.13 | 1.53  | 0.97   | -0.44 | 2.21  | [-0.517, 2.079]                     |
| Utilities                     | -0.92  | -1.30 | -0.55 | 0.01   | -0.36 | 0.38  | [0.570, 1.230]                      |
| Information                   | -0.66  | -1.76 | 0.31  | -0.50  | -1.46 | 0.59  | [-0.864, 1.271]                     |
| Financial Activities          | 0.85   | 0.24  | 1.38  | -0.26  | -0.79 | 0.36  | [-1.657, -0.523]                    |
| Prof. and Business Services   | 0.72   | -0.66 | 2.58  | 1.19   | -0.67 | 2.59  | [-1.433, 2.115]                     |
| Education and Health Services | 1.59   | -0.03 | 3.30  | 1.06   | -0.66 | 2.68  | [-2.490, 1.461]                     |
| Leisure and Hospitality       | 4.97   | -2.50 | 14.92 | 14.38  | 4.43  | 21.85 | [-0.933, 18.138]                    |
| Other Services                | 2.12   | -0.46 | 5.82  | 4.82   | 1.13  | 7.40  | [-1.080, 5.908]                     |

**Table A.6:** Median and 95% credible interval of the effects of demand and supply shocks on the growth rate of hours using production and nonsupervisory employees only, March 2020

| Sector                             | Demand |        |       | Supply |       |       |
|------------------------------------|--------|--------|-------|--------|-------|-------|
|                                    | Median | 2.5p   | 97.5p | Median | 2.5p  | 97.5p |
| Total Private                      | -0.43  | -1.17  | 0.02  | -1.48  | -1.94 | -0.74 |
| Mining and Logging                 | -0.37  | -1.16  | 0.19  | -1.33  | -1.96 | -0.57 |
| Construction                       | 0.64   | 0.13   | 0.96  | -1.18  | -1.51 | -0.66 |
| Manufacturing                      | -0.04  | -0.53  | 0.19  | -0.98  | -1.25 | -0.49 |
| Wholesale Trade                    | -0.03  | -0.30  | 0.11  | -0.65  | -0.81 | -0.39 |
| Retail Trade                       | 0.24   | -0.13  | 0.41  | -0.64  | -0.81 | -0.27 |
| Transportation and Warehousing     | -0.92  | -1.41  | -0.31 | -0.49  | -1.11 | -0.01 |
| Utilities                          | -0.19  | -0.67  | 0.14  | -0.67  | -1.01 | -0.19 |
| Information                        | 0.31   | 0.13   | 0.41  | -0.40  | -0.51 | -0.23 |
| Financial Activities               | -0.18  | -0.54  | 0.03  | -0.53  | -0.75 | -0.18 |
| Professional and Business Services | -0.20  | -0.63  | 0.03  | -1.02  | -1.27 | -0.59 |
| Education and Health Services      | -0.40  | -0.93  | 0.03  | -0.81  | -1.24 | -0.28 |
| Leisure and Hospitality            | -6.44  | -10.69 | -2.04 | -5.06  | -9.47 | -0.82 |
| Other Services                     | -0.90  | -2.25  | -0.04 | -1.97  | -2.82 | -0.61 |

Notes: The data sample for production and nonsupervisory employees we use to estimate our SVAR starts in 1984. Production and nonsupervisory employees CES series code for real wages is 32 and for aggregate weekly hours is 81.

**Table A.7:** Median and 95% credible interval of the effects of demand and supply shocks on the growth rate of hours using production and nonsupervisory employees only, April 2020

| Sector                             | Demand |        |       | Supply |        |        |
|------------------------------------|--------|--------|-------|--------|--------|--------|
|                                    | Median | 2.5p   | 97.5p | Median | 2.5p   | 97.5p  |
| Total Private                      | -5.98  | -12.99 | -0.50 | -12.62 | -18.09 | -5.61  |
| Mining and Logging                 | -5.43  | -11.91 | -0.85 | -9.68  | -14.26 | -3.18  |
| Construction                       | -6.93  | -19.39 | -0.67 | -13.20 | -19.46 | -0.75  |
| Manufacturing                      | -8.42  | -16.14 | -2.19 | -11.23 | -17.45 | -3.52  |
| Wholesale Trade                    | -4.07  | -8.16  | -0.33 | -6.90  | -10.63 | -2.81  |
| Retail Trade                       | -4.91  | -12.75 | -0.52 | -10.18 | -14.57 | -2.34  |
| Transportation and Warehousing     | -3.52  | -9.54  | 0.21  | -10.92 | -14.65 | -4.91  |
| Utilities                          | 0.16   | -0.87  | 0.70  | -1.46  | -2.00  | -0.43  |
| Information                        | -1.85  | -6.01  | 0.80  | -7.31  | -9.96  | -3.16  |
| Financial Activities               | -2.14  | -5.03  | -0.20 | -3.91  | -5.85  | -1.02  |
| Professional and Business Services | -3.05  | -7.91  | 0.01  | -10.27 | -13.32 | -5.41  |
| Education and Health Services      | -5.54  | -10.75 | -0.60 | -7.75  | -12.69 | -2.54  |
| Leisure and Hospitality            | -30.65 | -58.66 | -7.44 | -41.02 | -64.23 | -13.03 |
| Other Services                     | -8.69  | -20.02 | -0.95 | -16.03 | -23.77 | -4.69  |

Notes: The data sample for production and nonsupervisory employees we use to estimate our SVAR starts in 1984. Production and nonsupervisory employees CES series code for real wages is 32 and for aggregate weekly hours is 81.



## B Additional Figures

Figure B.1: Prior and posterior distribution of labor demand and supply elasticities by sector

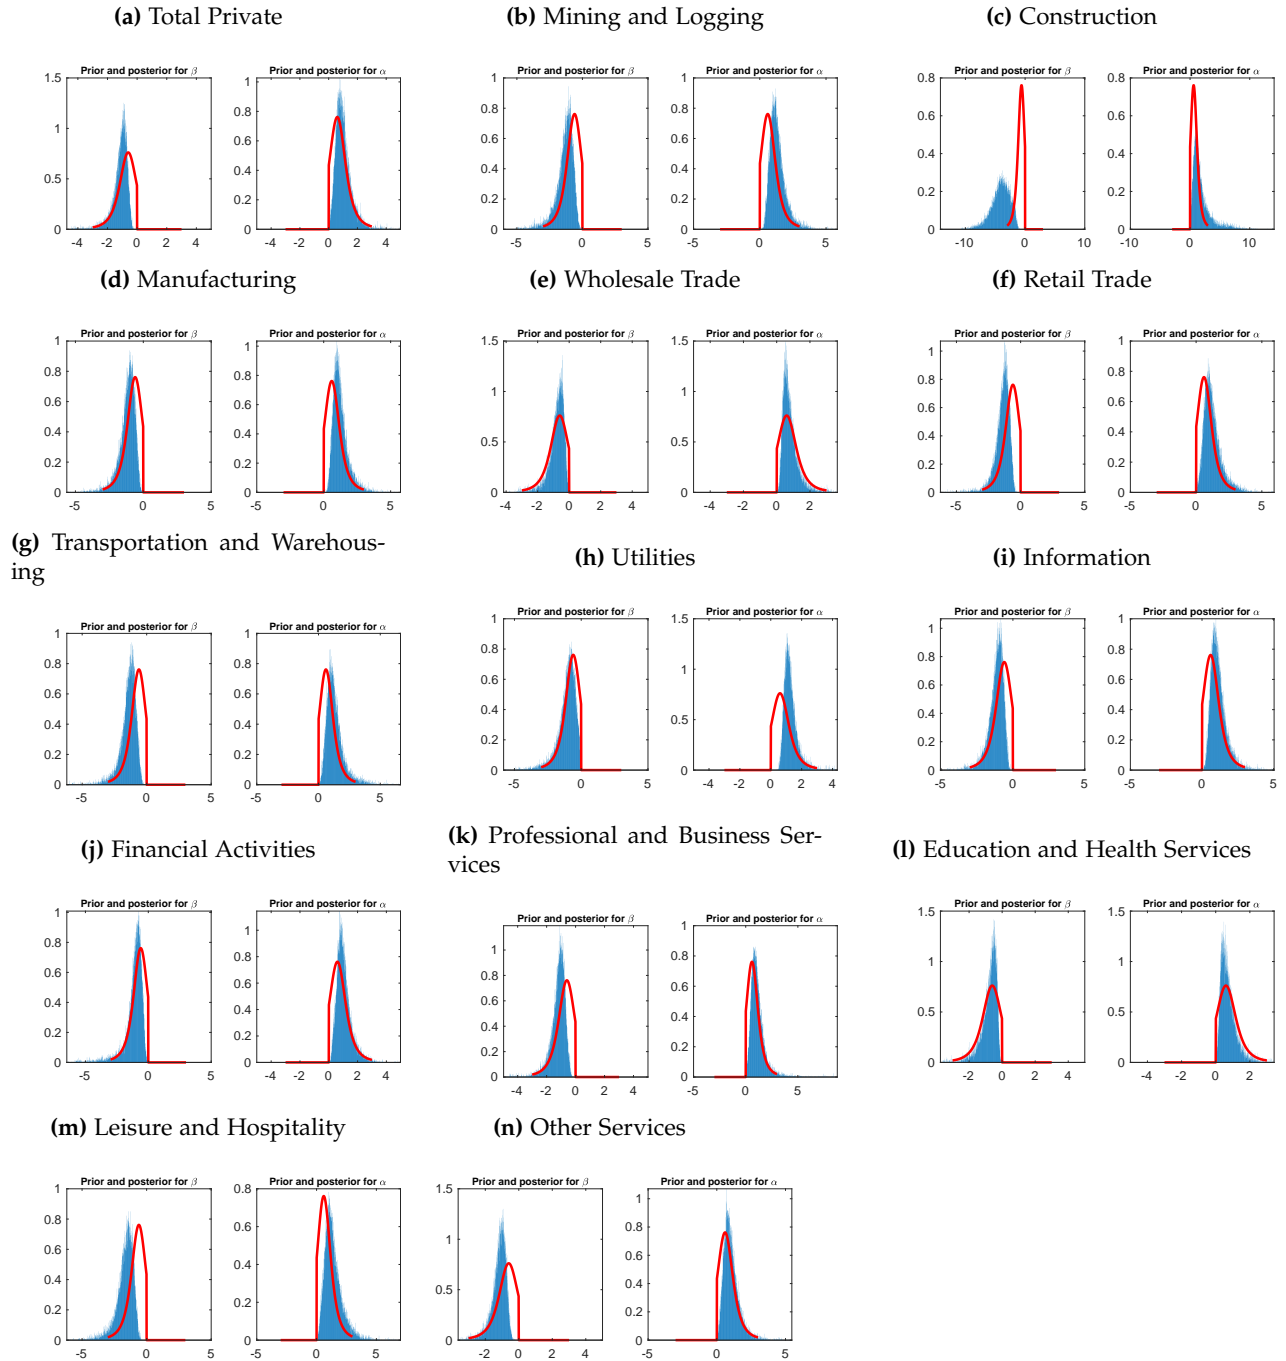

**Figure B.2:** Impulse response functions by sector with 95% credible bands

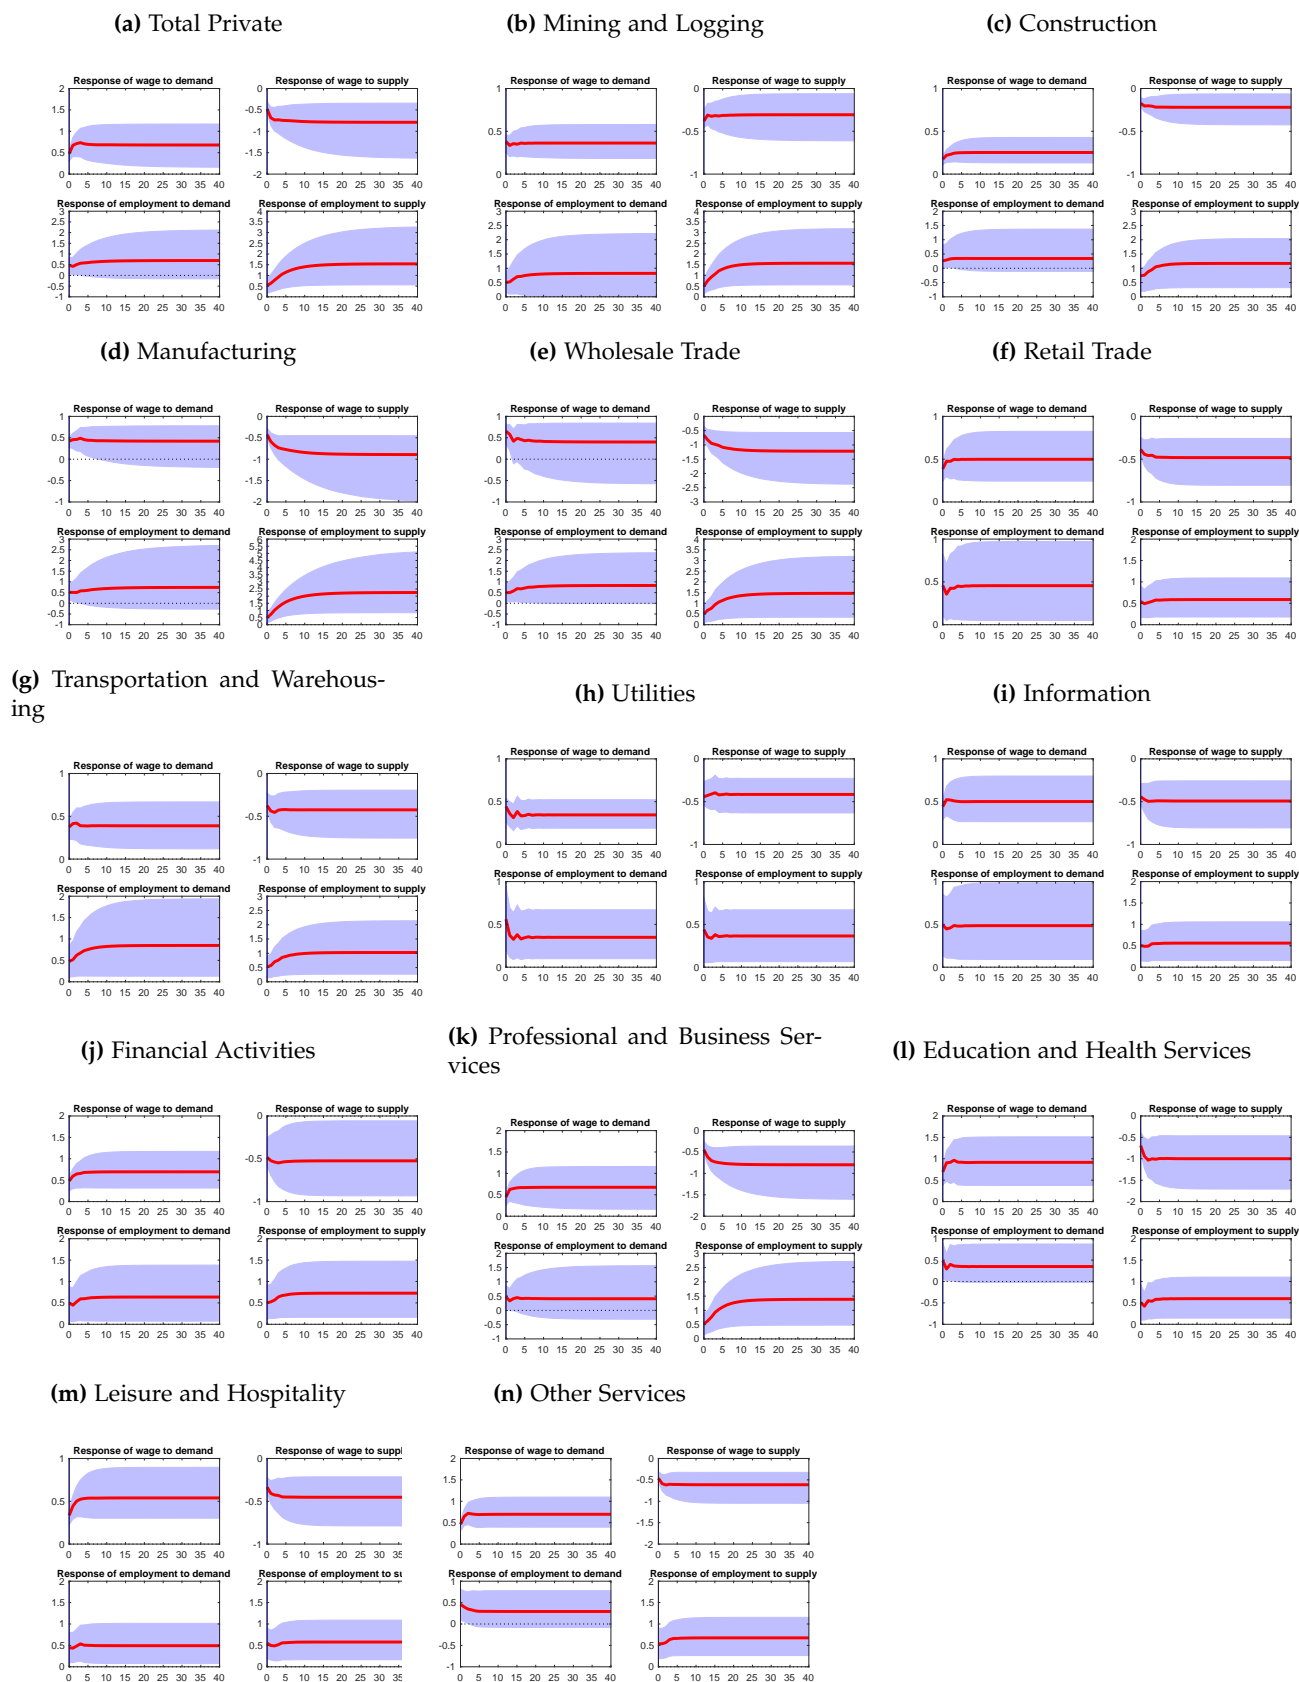

**Figure B.3:** Historical decomposition of the growth rate of hours by sector, excluding March, April and May 2020

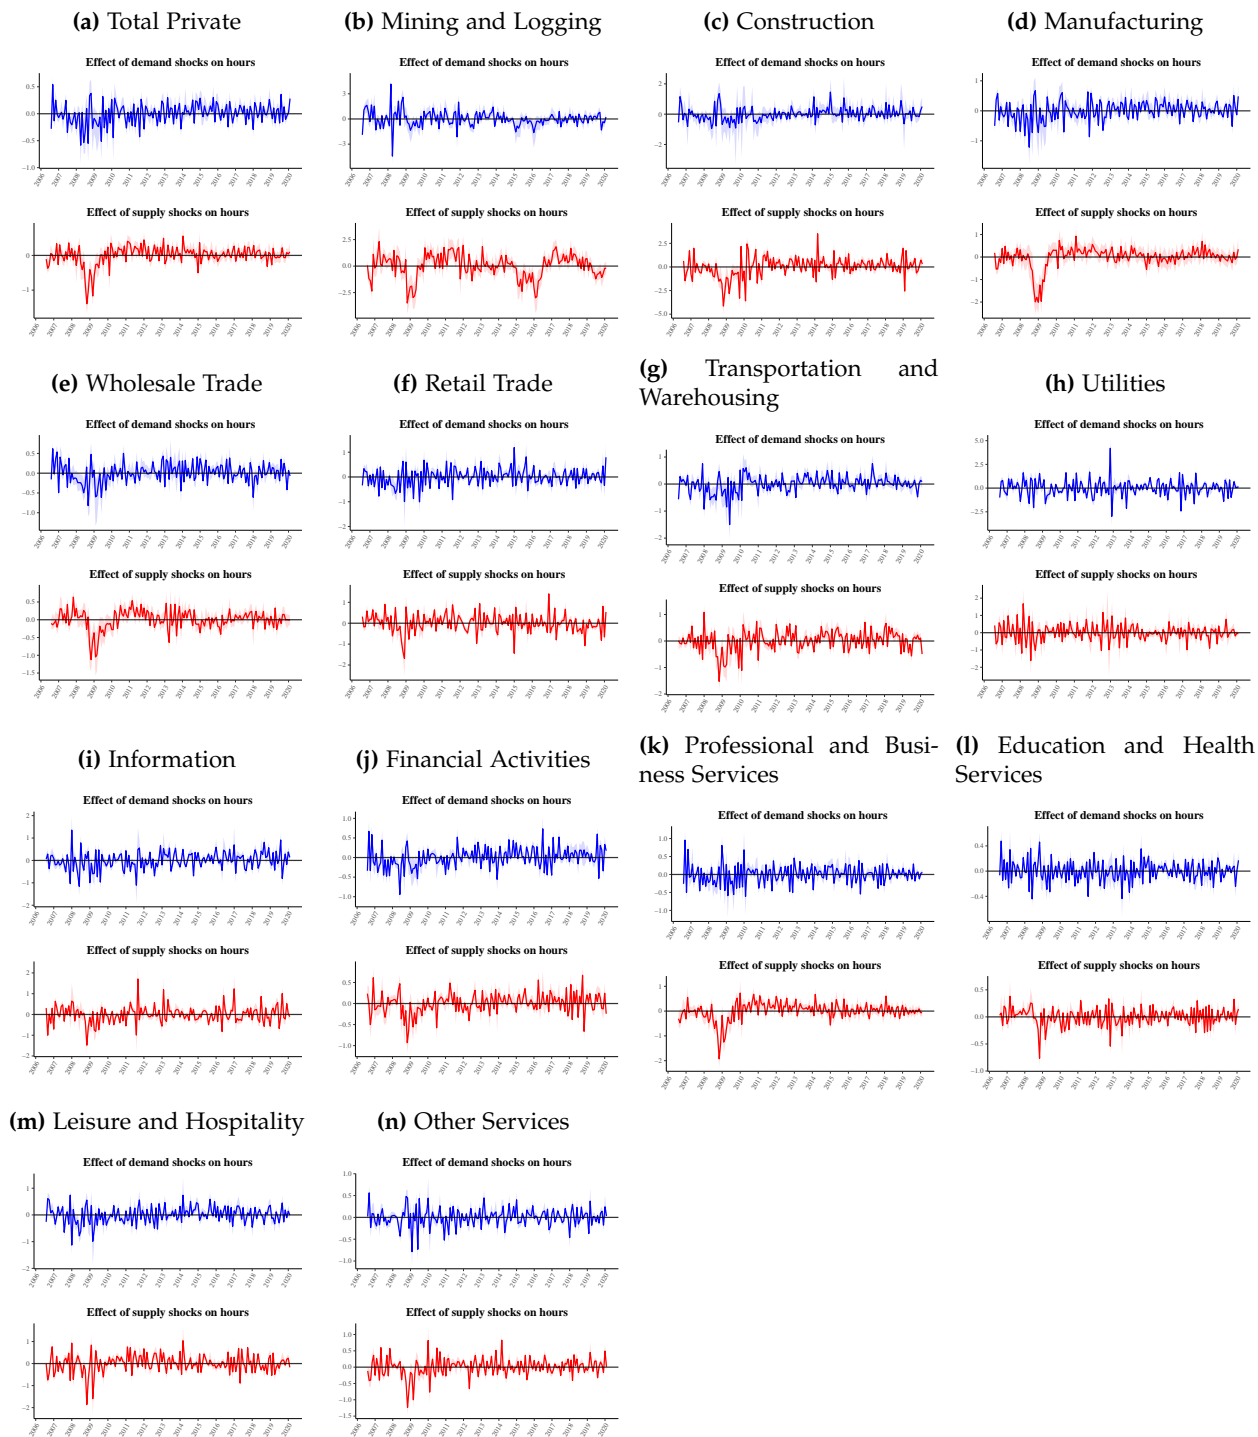

**Figure B.4:** Historical decomposition of the growth rate of hours by sector, full sample

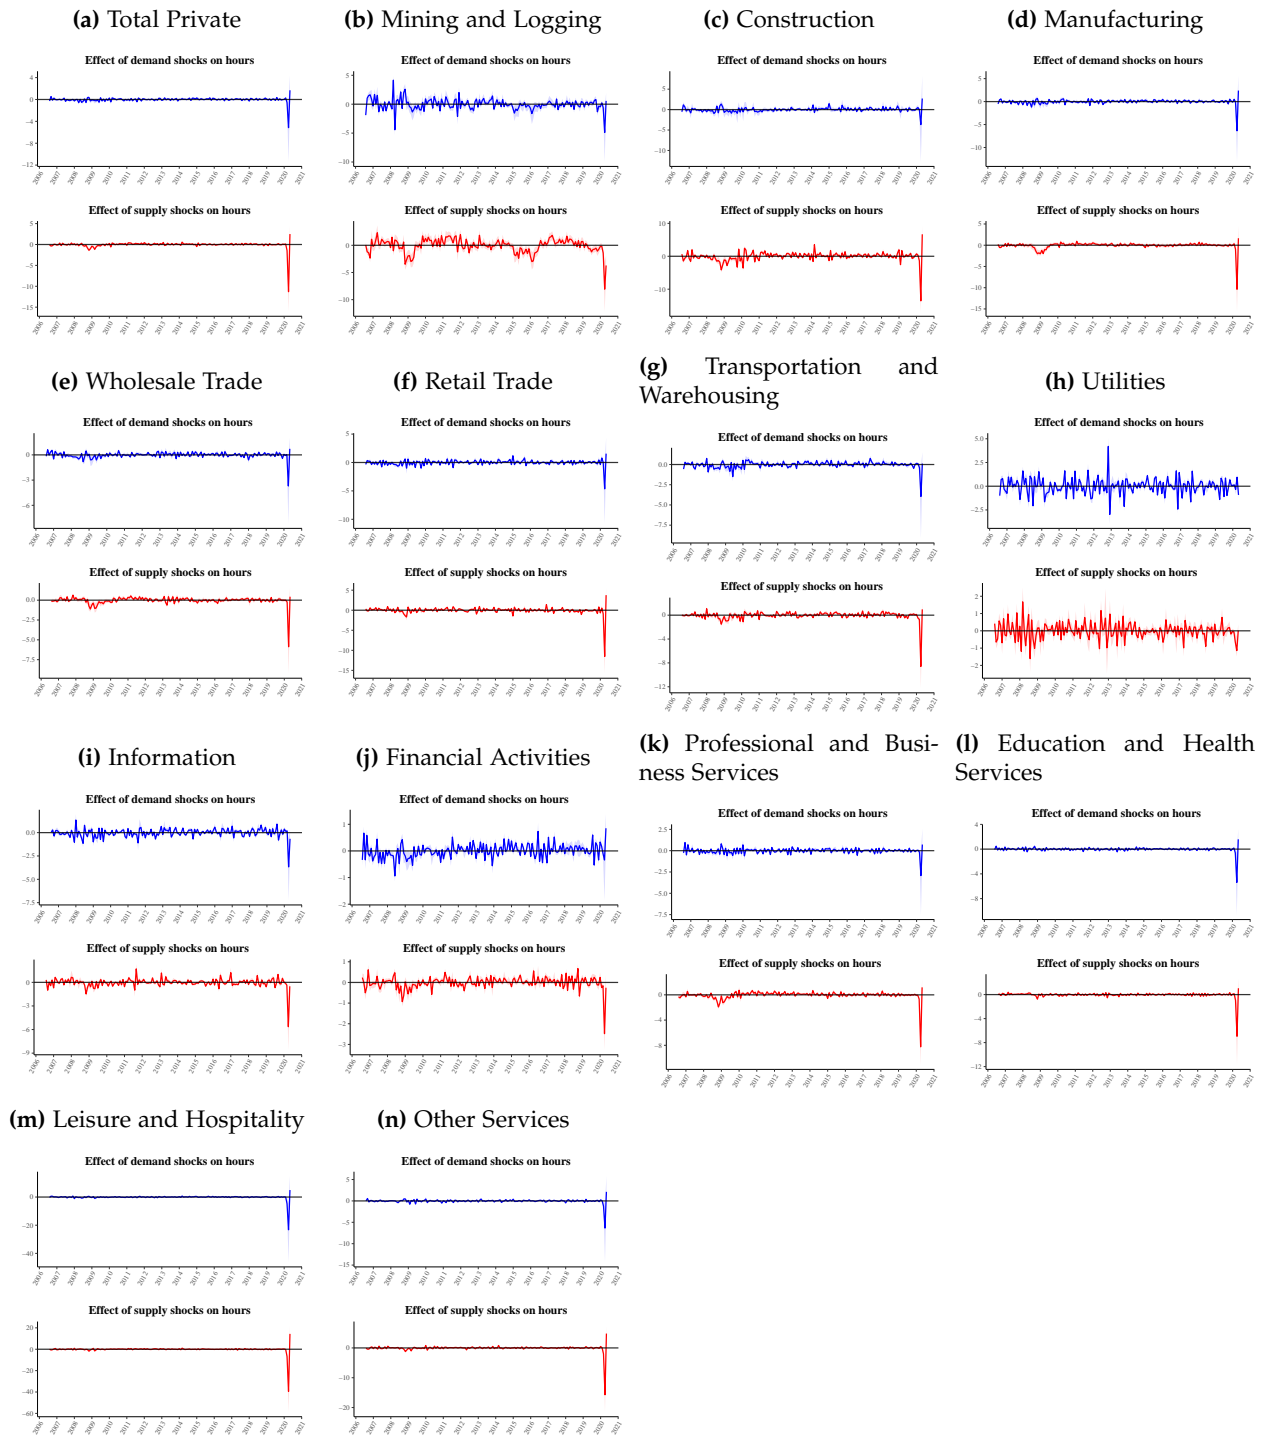

**Figure B.5:** Historical decomposition of the growth rate of hours across sectors, March 2019

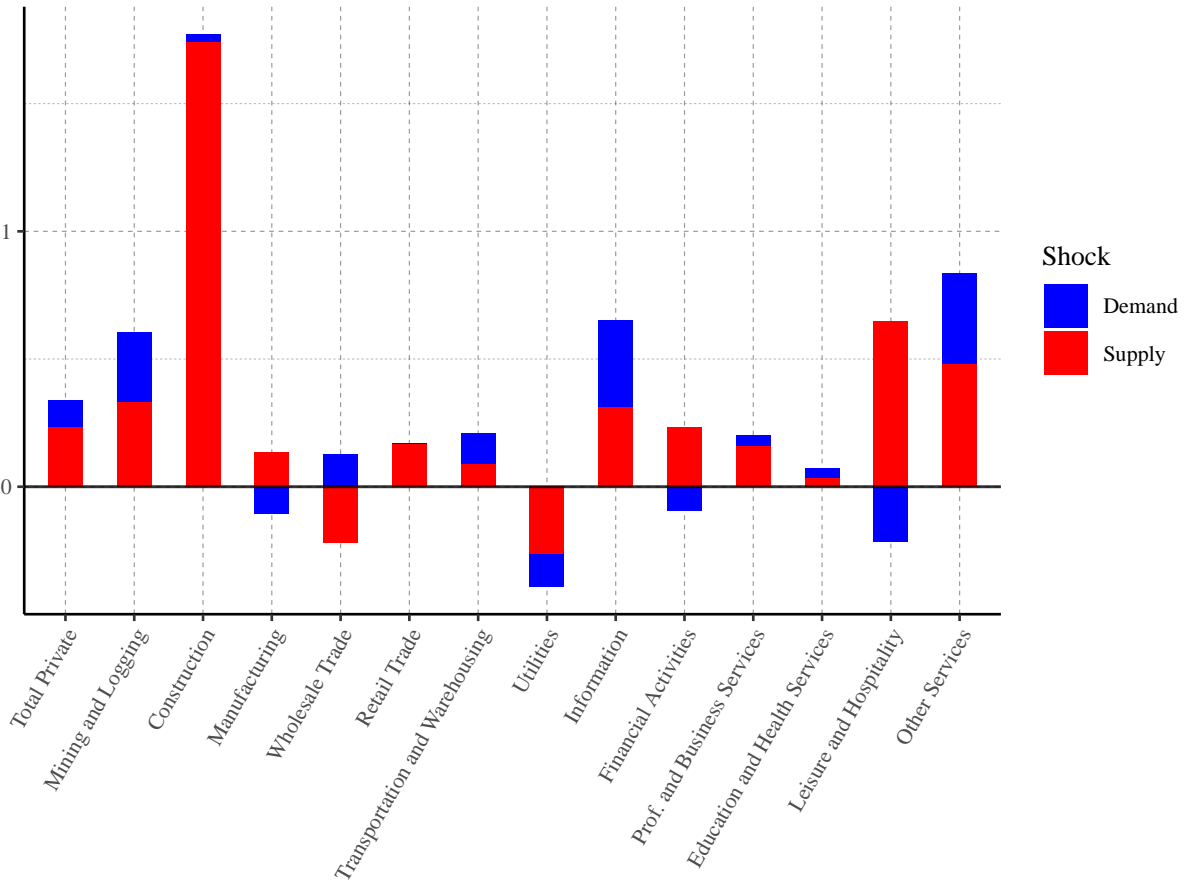

**Figure B.6:** Correlation between sectoral supply shocks the sectoral share of jobs that can be done at home

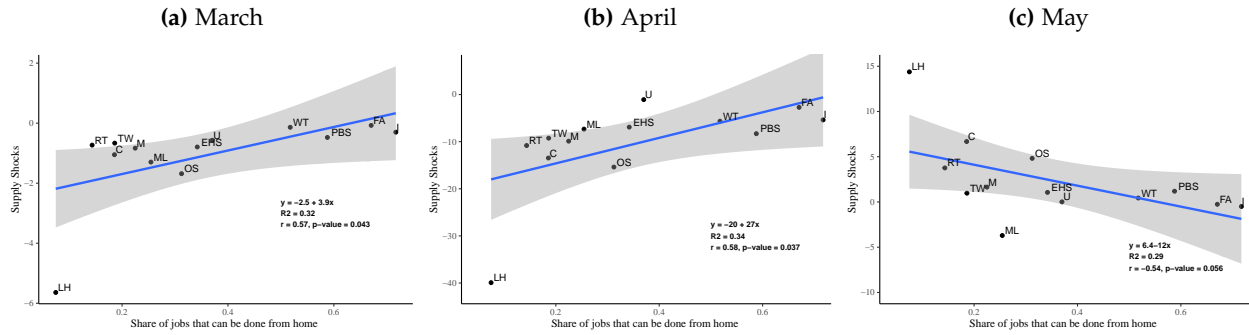

ML: Mining and logging; C: Construction; M: Manufacturing; WT: Wholesale trade; RT: Retail trade; TW: Transportation and warehousing; U: Utilities; I: Information; FA: Financial activities; PBS: Professional and business services; EHS: Education and health services; LH: Leisure and hospitality; OS: Other services. Grey bands represent 95% confidence intervals.

**Figure B.7:** Supply Shocks in 2019 vs. Share of jobs that can be done from home

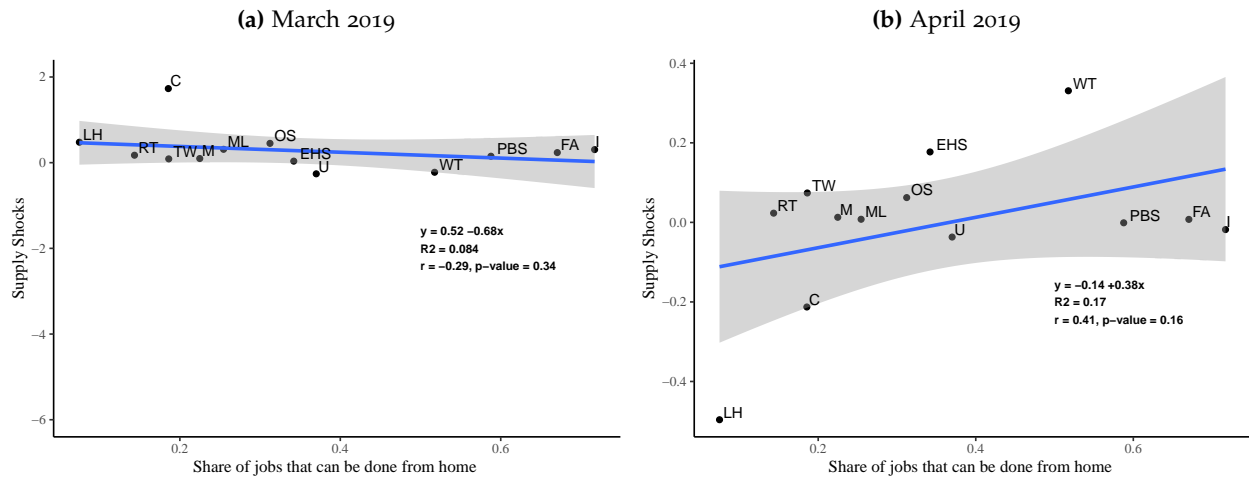

**ML:** Mining and logging; **C:** Construction; **M:** Manufacturing; **WT:** Wholesale trade; **RT:** Retail trade; **TW:** Transportation and warehousing; **U:** Utilities; **I:** Information; **FA:** Financial activities; **PBS:** Professional and business services; **EHS:** Education and health services; **LH:** Leisure and hospitality; **OS:** Other services. Grey bands represent 95% confidence intervals.
